# Supplementary material for: Deletion of microRNA-80 Activates Dietary Restriction to Extend C. elegans Healthspan and Lifespan
Source: PubMed Central journal article supplement (PMC3757059; doi:10.1371/journal.pgen.1003737), 2013-08-29
Supplement: pgen.1003737.s008.pdf [file pgen.1003737.s008.pdf]

**TABLE S1. An RNAi screen identifies *hsf-1* and *cbp-1* as required for the DR-associated Ex<sub>max</sub> shift phenotype in the *mir-80(Δ)* background**

We examined the literature for genes experimentally implicated in DR and used RNAi to knock these genes down in the *mir-80(Δ)* background (Day 4, 20°C, three independent trials, 50 animals / trial). Since the Ex<sub>max</sub> shift is diagnostic of the DR state, we reasoned that genetic interventions that reversed the shift would define genes needed for the *mir-80(Δ)* DR pathway. P-values were calculated using two-tailed unpaired Students T-test; gene knockdowns that confer statistically significant p-values are in bold.

| <i>mir-80(Δ)</i> Ex <sub>max</sub> Shifts |                 |           |                                    |                                                                                                    |                                                                                         |
|-------------------------------------------|-----------------|-----------|------------------------------------|----------------------------------------------------------------------------------------------------|-----------------------------------------------------------------------------------------|
| DR genes                                  | Mean wavelength | St. error | p-value against empty vector L4440 | Basic Function                                                                                     | Required for                                                                            |
| <i>Empty Vector</i>                       | 341.37          | 0.73      |                                    |                                                                                                    |                                                                                         |
| <i>aak-1</i>                              | 338.66          | 4.05      | 0.278                              | AMP-activated kinase; negatively regulates germline proliferation during dauer development [S1,S2] | hypothesized to induce DR like <i>aak-2</i> but not established [S1,S2]                 |
| <i>aak-2</i>                              | 338.33          | 0.88      | 0.166                              | AMP-activated kinase; negatively regulates germline proliferation during dauer development [4]     | Over-expression confers lifespan extension by solid and peptone dilution DR methods [4] |
| <i>bec-1</i>                              | 342.00          | 0.00      | 0.770                              | essential autophagy gene [S3]                                                                      | lifespan extension in <i>eat-2</i> mutant                                               |

|                     |               |             |              |                                                                                                                                               |                                                                                            |
|---------------------|---------------|-------------|--------------|-----------------------------------------------------------------------------------------------------------------------------------------------|--------------------------------------------------------------------------------------------|
|                     |               |             |              |                                                                                                                                               | [S4]                                                                                       |
| <b><i>cbp-1</i></b> | <b>346.00</b> | <b>2.30</b> | <b>0.046</b> | histone acetyltransferase activity and required during embryogenesis for differentiation of all non-neuronal somatic cell types [34]          | lifespan extension by three different DR regimens [34]                                     |
| <i>clk-1</i>        | 341.33        | 1.76        | 0.984        | biological timing abnormality; encodes a mitochondrial protein involved in ubiquinone biosynthesis [27]                                       | lifespan extension by solid dilution DR method and <i>eat-2</i> mutant [4]                 |
| <i>cup-4</i>        | 342.33        | 0.88        | 0.657        | encodes a coelomocyte-specific, ligand-gated ion channel [S4]                                                                                 | reduces lifespan in <i>eat-2</i> mutant [S4]                                               |
| <i>dve-1</i>        | 343.66        | 0.88        | 0.293        | forms complex for unfolded protein stress in mitochondria; vulval development [34]                                                            | lifespan extension by three different DR regimens [34]                                     |
| <i>hif-1</i>        | 343.33        | 0.66        | 0.366        | hypoxia-induced transcription factor complex; roles in oxygen homeostasis, tumor formation, glucose metabolism and inflammatory response [S5] | lifespan extension by solid DR method [S5]                                                 |
| <b><i>hsf-1</i></b> | <b>345.66</b> | <b>0.88</b> | <b>0.055</b> | heat shock factor; transcription regulator required for heat-shock and proteotoxicity response; [4,36]                                        | required for lifespan extension by dietary deprivation DR method                           |
| <i>ire-1</i>        | 343.33        | 0.66        | 0.366        | endoplasmic reticulum (ER) stress regulator; associated with lower levels of ER stress [S5]                                                   | required for lifespan and healthspan extension; lifespan extension by solid DR method [S5] |
| <i>nlp-1</i>        | 344.00        | 2.00        | 0.244        | a neuropeptide that                                                                                                                           | none                                                                                       |

|                |        |      |       |                                                                                                                                             |                                                                                                            |
|----------------|--------|------|-------|---------------------------------------------------------------------------------------------------------------------------------------------|------------------------------------------------------------------------------------------------------------|
|                |        |      |       | regulates acetylcholine-induced muscle contraction, expressed in neurons, pharyngeal and intestine [S6,S7]                                  | documented, tested for regulation of pharyngeal contraction in DR mutants [S7]                             |
| <i>rheb-1</i>  | 341.33 | 0.66 | 0.984 | mitochondrial unfolded protein response gene required for normal growth rates, body size, osmoregulation, reproduction, and locomotion [S8] | lifespan extension by alternate day or every two day fasting regime and dietary deprivation DR method [S8] |
| <i>sir-2.1</i> | 342.33 | 2.33 | 0.671 | encodes one of 4 <i>C. elegans</i> proteins that are HDACs that influence lifespan [S9]                                                     | extra-chromosomal transgenic animals with over-expression experience lifespan extension [S9]               |
| <i>skn-1</i>   | 343.33 | 0.66 | 0.366 | transcription factor required for embryonic development/EMS blastomere [7]                                                                  | needed in ASI neurons for food limitation-induced DR lifespan benefits [7] and <i>eat-2</i> mutant         |
| <i>ubc-18</i>  | 341.66 | 0.88 | 0.892 | ubiquitin conjugating enzyme; regulates pharyngeal morphogenesis during early embryonic development [S10]                                   | reduces lifespan in <i>eat-2</i> mutant [S10]                                                              |
| <i>vps-34</i>  | 344.66 | 1.76 | 0.144 | vacuolar protein sorting in yeast, autophagy; regulates endocytosis required for growth and                                                 | required for <i>bec-1</i> pathway [S11]                                                                    |

|  |  |  |  |                   |  |
|--|--|--|--|-------------------|--|
|  |  |  |  | development [S11] |  |
|--|--|--|--|-------------------|--|
