# Supplementary material for: Deletion of microRNA-80 Activates Dietary Restriction to Extend C. elegans Healthspan and Lifespan
Source: PubMed Central journal article supplement (PMC3757059; doi:10.1371/journal.pgen.1003737), 2013-08-29
Supplement: pgen.1003737.s009.pdf [file pgen.1003737.s009.pdf]

**TABLE S2. RNAi directed against known DR genes in the *mir-80*( $\Delta$ ) background identify genes required for the low age pigment level phenotype.**

We used RNAi to knockdown genes previously implicated in DR in the *mir-80*( $\Delta$ ) background (Day 4, 20°C, three independent trials, 50 animals/trial) and quantitated age pigment levels relative to endogenous Trp levels. Since low age pigment/Trp ratios (AGE/TRP) are associated with the DR state [19], we reasoned that genetic interventions that elevated age pigment levels would help identify genes needed for the *mir-80*( $\Delta$ ) DR pathway and/or for enhanced healthspan. P-values were calculated using the Unpaired two-tailed Student's T-test, values within the 90% confidence level are bold, increase or decrease indicated by arrows.

| <b><i>mir-80</i>(<math>\Delta</math>) Age Pigments</b> |                |           |                           |
|--------------------------------------------------------|----------------|-----------|---------------------------|
| RNAi Clone                                             | Mean (AGE/TRP) | St. Error | p-value against own L4440 |
| <b>L4440 vector</b>                                    | 0.459          | 0.02      |                           |
| <b><i>aak-1</i></b>                                    | 0.643          | 0.03      | <b>0.04</b> ↑             |
| <b><i>aak-2</i></b>                                    | 0.625          | 0.02      | <b>0.06</b> ↑             |
| <b><i>bec-1</i></b>                                    | 0.360          | 0.11      | 0.292                     |
| <b><i>cbp-1</i></b>                                    | 0.613          | 0.09      | <b>0.099</b> ↑            |
| <b><i>clk-1</i></b>                                    | 0.348          | 0.02      | 0.208                     |
| <b><i>cup-4</i></b>                                    | 0.414          | 0.01      | 0.603                     |
| <b><i>dve-1</i></b>                                    | 0.543          | 0.02      | 0.336                     |
| <b><i>hif-1</i></b>                                    | 0.539          | 0.15      | 0.420                     |
| <b><i>hsf-1</i></b>                                    | 0.651          | 0.08      | <b>0.041</b> ↑            |
| <b><i>ire-1</i></b>                                    | 0.381          | 0.03      | 0.374                     |
| <b><i>nlp-1</i></b>                                    | 0.400          | 0.06      | 0.511                     |
| <b><i>pgp-2</i></b>                                    | 0.419          | 0.02      | 0.649                     |
| <b><i>rheb-1</i></b>                                   | 0.352          | 0.01      | 0.223                     |
| <b><i>sir-2.1</i></b>                                  | 0.270          | 0.06      | <b>0.041</b>              |
| <b><i>skn-1</i></b>                                    | 0.683          | 0.02      | <b>0.015</b> ↑            |

|                      |       |      |       |
|----------------------|-------|------|-------|
| <b><i>ubc-18</i></b> | 0.432 | 0.02 | 0.754 |
| <b><i>vps-34</i></b> | 0.599 | 0.05 | 0.121 |
