# Supplementary material for: Deletion of microRNA-80 Activates Dietary Restriction to Extend C. elegans Healthspan and Lifespan
Source: PubMed Central journal article supplement (PMC3757059; doi:10.1371/journal.pgen.1003737), 2013-08-29
Supplement: pgen.1003737.s010.pdf [file pgen.1003737.s010.pdf]

**Supplementary Table S3—Strains used in this study**

| Strain name | Genotype                                                                                                                                                  |
|-------------|-----------------------------------------------------------------------------------------------------------------------------------------------------------|
| ZB3035      | <i>mir-80(nDf53)</i> 6x outcrossed to our N2 wild type                                                                                                    |
| ZB3036      | <i>mir-80(nDf53);nEx1457</i> (array nEx1457 from [18])                                                                                                    |
| ZB3037      | <i>mir-80(nDf53);is007</i> (transgene is007 from [7])                                                                                                     |
| ZB3038      | <i>eat-2(ad1116);is007</i> (transgene is007 from [7])                                                                                                     |
| ZB3044      | <i>mir-80(nDf53);daf-16(mgDf50)</i>                                                                                                                       |
| ZB3045      | <i>mir-80(nDf53);hsf-1(sy441)(ts)</i>                                                                                                                     |
| ZB3039      | <i>bzEx207</i> [pMV100( $P_{mir-80L}$ :mCherry) + pRF6{ <i>rol-6(su1006)</i> }] Line #6                                                                   |
| ZB3040      | <i>bzEx208</i> [pMV100( $P_{mir-80L}$ :mCherry) + pRF6{ <i>rol-6(su1006)</i> }] Line #7                                                                   |
| ZB3041      | <i>bzEx209</i> [pMV100( $P_{mir-80L}$ :mCherry) + pRF6{ <i>rol-6(su1006)</i> }] Line #8                                                                   |
| ZB3042      | <i>bzEx210</i> [pMV100( $P_{mir-80L}$ :mCherry) + pRF6{ <i>rol-6(su1006)</i> }] Line #9                                                                   |
| ZB3043      | <i>bzEx211</i> [pMV100( $P_{mir-80L}$ :mCherry) + pRF6{ <i>rol-6(su1006)</i> }] Line #10                                                                  |
| ZB3047      | <i>bzEx213</i> [pMV101( $P_{cbp-1}$ :GFP NBS) + $P_{mec4}$ :mCherry] Line #2                                                                              |
| ZB3054      | <i>bzEx220</i> [pMV102( $P_{cbp-1}$ :5'bs-GFP-3'BS) + $P_{mec4}$ :mCherry] Line #2                                                                        |
| ZB3056      | <i>mir-80(nDf53); bzEx222</i> [pMV102( $P_{cbp-1}$ :5'bs-GFP-3'BS) + $P_{mec4}$ :mCherry] Line #2                                                         |
| ZB3058      | <i>mir-80(nDf53); bzEx224</i> [pMV101( $P_{cbp-1}$ :GFP NBS) + $P_{mec4}$ :mCherry] Line #2                                                               |
| ZB3060      | <i>mir-80(nDf53);uls57</i> [ $P_{unc-119}$ : <i>sid-1</i> , $P_{unc-119}$ : <i>yfp</i> + $P_{mec-6}$ : <i>mec-6</i> ] Transgene <i>uls57</i> is from [59] |

TU3270

*uls57*[ $P_{unc-119:sid-1}$ ,  $P_{unc-119:yfp}$  +  $P_{mec-6:mec-6}$ ] Transgene *uls57* is from [59]
