# Supplementary material for: Deletion of microRNA-80 Activates Dietary Restriction to Extend C. elegans Healthspan and Lifespan
Source: PubMed Central journal article supplement (PMC3757059; doi:10.1371/journal.pgen.1003737), 2013-08-29
Supplement: pgen.1003737.s011.pdf [file pgen.1003737.s011.pdf]

### Supplementary Table S4:

Summary of lifespan experiments. Median lifespan is calculated from the GraphPad Prism Software while Maximum lifespan was calculated by the mean lifespan of the oldest 10% cohort in each experiment. P-values are calculated from Log-Rank Tests for the entire population for the complete lifespan.

| <b>Trial 1 (Fig 1D)</b> | Number of animals | Median Lifespan (days) | Maximal Lifespan (days) | p-value against N2 | % change against N2 |
|-------------------------|-------------------|------------------------|-------------------------|--------------------|---------------------|
| N2                      | 78                | 13.5                   | 17.94                   |                    |                     |
| <i>Mir-80(nDf53)</i>    | 81                | 14                     | 21.22                   | p<0.01             | 18.2                |

| <b>Trial 2 (Fig 1D)</b> | Number of animals | Median Lifespan (days) | Maximal Lifespan (days) | p-value against N2 | % change against N2 |
|-------------------------|-------------------|------------------------|-------------------------|--------------------|---------------------|
| N2                      | 99                | 16                     | 23.48                   |                    |                     |
| <i>mir-80(nDf53)</i>    | 100               | 16.5                   | 25.23                   | p<0.05             | 7.5                 |

| <b>Trial 3 (Fig 1D)</b> | Number of animals | Median Lifespan (days) | Maximal Lifespan (days) | p-value against N2 | % change against N2 |
|-------------------------|-------------------|------------------------|-------------------------|--------------------|---------------------|
| N2                      | 98                | 16.5                   | 23.87                   |                    |                     |
| <i>mir-80(nDf53)</i>    | 99                | 17.0                   | 25.05                   | p=0.5398           | 4.9                 |

| <b>Trial 4 (Fig 1D)</b>                 | Number of animals | Median Lifespan (days) | Maximal Lifespan (days) | p-value against N2 | % change against N2 |
|-----------------------------------------|-------------------|------------------------|-------------------------|--------------------|---------------------|
| N2                                      | 99                | 16.0                   | 23.66                   |                    |                     |
| <i>mir-80(nDf53)</i>                    | 104               | 18.0                   | 26.45                   | p=0.1357           | 11.79               |
| <i>mir-80(nDf53);Ex[Pmir-80:mir-80]</i> | 37                | 13.0                   | 24.5                    | p=0.40             | 3.5                 |

| <b>Trial 5 (Fig 1D)</b>          | Number of animals | Median Lifespan (days) | Maximal Lifespan (days) | p-value against N2 | % change against N2 |
|----------------------------------|-------------------|------------------------|-------------------------|--------------------|---------------------|
| N2                               | 60                | 14                     | 26.27                   |                    |                     |
| <i>mir-80(nDf53)</i>             | 40                | 16.5                   | 27.76                   | p<0.01             | 5.6                 |
| <i>mir-80(nDf53);Ex[Pmir-80]</i> | 25                | 15                     | 21.76                   | p=0.65             | -17.1               |

| <b>Trial 6 (Fig 1D)</b>          | Number of animals | Median Lifespan (days) | Maximal Lifespan (days) | p-value against N2 | % change against N2 |
|----------------------------------|-------------------|------------------------|-------------------------|--------------------|---------------------|
| N2                               | 40                | 14.5                   | 24.56                   |                    |                     |
| <i>mir-80(nDf53)</i>             | 50                | 17                     | 33.1                    | p<0.01             | 34.7                |
| <i>mir-80(nDf53);Ex[Pmir-80]</i> | 29                | 13.00                  | 23.8                    | p<0.05             | -3.09               |

| <b>Trial 1 (Fig 4c)</b>             | Number of animals | Median Lifespan (days) | Maximal Lifespan (days) | p-value against N2 | % change against N2 |
|-------------------------------------|-------------------|------------------------|-------------------------|--------------------|---------------------|
| N2                                  | 58                | 19                     | 29.36                   |                    |                     |
| <i>mir-80(nDf53)</i>                | 60                | 21                     | 28.83                   |                    | -8.00               |
| <i>daf-16(mgDf50)</i>               | 61                | 13.00                  | 20.6                    | p<0.05             | -29.83              |
| <i>mir-80(nDf53);daf-16(mgDf50)</i> | 57                | 14                     | 20.44                   | p<0.05             | -30.38              |

| <b>Trial 2 (Fig 4c)</b>             | Number of animals | Median Lifespan (days) | Maximal Lifespan (days) | p-value against N2 | % change against N2 |
|-------------------------------------|-------------------|------------------------|-------------------------|--------------------|---------------------|
| N2                                  | 63                | 17                     | 26.82                   |                    |                     |
| <i>mir-80(nDf53)</i>                | 60                | 21                     | 34.25                   | p<0.01             | 27.7                |
| <i>daf-16(mgDf50)</i>               | 59                | 14                     | 22.44                   | p<0.05             | -16.38              |
| <i>mir-80(nDf53);daf-16(mgDf50)</i> | 60                | 16                     | 24.15                   | p<0.05             | -10.02              |

| <b>Trial 1 (Fig 4d)</b>    | Number of animals | Median Lifespan (days) | Maximal Lifespan (days) | p-value against N2 (L4440) | % change against N2 (L4440) |
|----------------------------|-------------------|------------------------|-------------------------|----------------------------|-----------------------------|
| N2;L4440                   | 93                | 14                     | 29.94                   |                            |                             |
| <i>mir-80(nDf53);L4440</i> | 83                | 17                     | 31.61                   | p<0.01                     | 5.5                         |
| <i>N2(daf-2 RNAi)</i>      | 80                | 18                     | 38.56                   | p<0.01                     | 28.79                       |
| <i>mir-</i>                | 79                | 17                     | 36.97                   | p<0.01                     | 23.4                        |

|                                        |  |  |  |  |  |
|----------------------------------------|--|--|--|--|--|
| 80( <i>nDf53</i> ; <i>daf-2 RNAi</i> ) |  |  |  |  |  |
|----------------------------------------|--|--|--|--|--|

| <b>Trial 2 (Fig 4d)</b>         | Number of animals | Median Lifespan (days) | Maximal Lifespan (days) | p-value against N2 (L4440) | % change against N2 (L4440) |
|---------------------------------|-------------------|------------------------|-------------------------|----------------------------|-----------------------------|
| N2;L4440                        | 50                | 18                     | 34.1                    |                            |                             |
| <i>mir-80(nDf53)</i> ;L4440     | 30                | 20                     | 39.8                    | p<0.01                     | 16.7                        |
| N2( <i>daf-2 RNAi</i> )         | 48                | 27                     | 44.05                   | p<0.01                     | 29.1                        |
| <i>mir-80(nDf53;daf-2 RNAi)</i> | 42                | 27                     | 36.5                    | p<0.01                     | 7.0                         |

| <b>Trial 3 (Fig 4d)</b>         | Number of animals | Median Lifespan (days) | Maximal Lifespan (days) | p-value against N2 (L4440) | % change against N2 (L4440) |
|---------------------------------|-------------------|------------------------|-------------------------|----------------------------|-----------------------------|
| N2;L4440                        | 50                | 18                     | 26.57                   |                            |                             |
| <i>mir-80(nDf53)</i> ;L4440     | 31                | 18                     | 34.75                   | p<0.01                     | 30.7                        |
| N2( <i>daf-2 RNAi</i> )         | 50                | 22                     | 40.67                   | p<0.01                     | 53.06                       |
| <i>mir-80(nDf53;daf-2 RNAi)</i> | 41                | 24                     | 42.09                   | p<0.01                     | 58.4                        |

| <b>Trial 1 (Fig 6c)</b>         | Number of animals | Median Lifespan (days) | Maximal Lifespan (days) | p-value against N2 (L4440) | % change against N2 (L4440) |
|---------------------------------|-------------------|------------------------|-------------------------|----------------------------|-----------------------------|
| N2;L4440                        | 50                | 18                     | 26.57                   |                            |                             |
| <i>mir-80(nDf53)</i> ;L4440     | 31                | 18                     | 34.75                   | p<0.01                     | 30.7                        |
| N2( <i>cbp-1 RNAi</i> )         | 42                | 16                     | 20.12                   | p<0.01                     | -24.27                      |
| <i>mir-80(nDf53;cbp-1 RNAi)</i> | 40                | 16                     | 20.54                   | p<0.01                     | -22.69                      |

| <b>Trial 2 (Fig 6c)</b> | Number of | Median | Maximal | p-value | % |
|-------------------------|-----------|--------|---------|---------|---|
|-------------------------|-----------|--------|---------|---------|---|

|                                 | animals | Lifespan (days) | Lifespan (days) | against N2 (L4440) | change against N2 (L4440) |
|---------------------------------|---------|-----------------|-----------------|--------------------|---------------------------|
| <i>N2(cbp-1 RNAi)</i>           | 40      | 18              | 18.87           | NA                 | NA                        |
| <i>mir-80(nDf53);cbp-1 RNAi</i> | 39      | 18              | 19.09           | NA                 | NA                        |

NA = Wildtype and *mir-80*( $\Delta$ ) not performed for this trial.

| <b>Trial 3 (Fig 6c)</b>         | Number of animals | Median Lifespan (days) | Maximal Lifespan (days) | p-value against N2 (L4440) | % change against N2 (L4440) |
|---------------------------------|-------------------|------------------------|-------------------------|----------------------------|-----------------------------|
| <i>N2(cbp-1 RNAi)</i>           | 60                | 13                     | 19.8                    | NA                         | NA                          |
| <i>mir-80(nDf53);cbp-1 RNAi</i> | 60                | 15                     | 20.13                   | NA                         | NA                          |

NA = Wildtype and *mir-80*( $\Delta$ ) not performed for this trial.

**Individual Trials for Age pigment accumulation at Day 4 for Figs 4a, 5a, and 6a.**  
Fig 4,5,6a

|                                                                      | Trial 1 | Trial 2 | Trial 3 | Mean   | SEM  | T-test                                          |
|----------------------------------------------------------------------|---------|---------|---------|--------|------|-------------------------------------------------|
| <b>WT</b>                                                            | 346     | 347     | 348     | 347    | 0.57 |                                                 |
| <b><i>mir-80</i>(<math>\Delta</math>)</b>                            | 344     | 340     | 342     | 342    | 1.15 | p<0.05 (vs WT)                                  |
| <b><i>daf-16(mgDf50)</i></b>                                         | 347     | 349     | 349     | 348.33 | 0.67 | NS (vs WT)                                      |
| <b><i>mir-80</i>(<math>\Delta</math>);<br/><i>daf-16(mgDf50)</i></b> | 344     | 350     | 347     | 347    | 1.73 | NS (vs WT)                                      |
| <b>WT (Empty vector)</b>                                             | 345     | 346     | 348     | 346.3  | 0.88 |                                                 |
| <b><i>mir-80</i>(<math>\Delta</math>) (Empty Vector)</b>             | 342     | 342     | 340     | 341.67 | 0.67 | p<0.001 (against wt EV)                         |
| <b><i>mir-80</i>(<math>\Delta</math>) (<i>hsf-1 RNAi</i>)</b>        | 347     | 346     | 344     | 345.67 | 0.88 | p=0.055 (against <i>mir-80</i> ( $\Delta$ ) EV) |
| <b><i>mir-80</i>(<math>\Delta</math>) (<i>cbp-1 RNAi</i>)</b>        | 346     | 342     | 350     | 346    | 2.3  | p<0.05 (against <i>mir-80</i> ( $\Delta$ ) EV)  |

**Individual Trials for Age pigment accumulation at Day 4 for Figs 4b, 5b, and 6b.**  
Fig 4,5,6b

|  | Trial 1 | Trial 2 | Trial 3 | Mean | SEM | T-test |
|--|---------|---------|---------|------|-----|--------|
|--|---------|---------|---------|------|-----|--------|

|                                             |      |       |       |      |      |                                      |
|---------------------------------------------|------|-------|-------|------|------|--------------------------------------|
| <b>WT</b>                                   | 0.50 | 0.48  | 0.57  | 0.51 | 0.02 |                                      |
| <b><i>mir-80(Δ)</i></b>                     | 0.30 | 0.36  | 0.30  | 0.32 | 0.02 | p<0.05 (vs WT)                       |
| <b><i>daf-16(mgDf50)</i></b>                | 1.03 | 1.15  | 1.59  | 1.25 | 0.16 | p<0.01 (vs WT)                       |
| <b><i>mir-80(Δ); daf-16(mgDf50)</i></b>     | 0.99 | 1.23  | 1.51  | 1.24 | 0.14 | p<0.01 (vs WT)                       |
| <b>WT (Empty vector)</b>                    | 1.01 | 0.75  | 0.799 | 0.85 | 0.08 |                                      |
| <b><i>mir-80(Δ)</i> (Empty Vector)</b>      | 0.36 | 0.74  | 0.36  | 0.49 | 0.12 | p<0.001 (against wt EV)              |
| <b><i>mir-80(Δ)</i> (<i>hsf-1 RNAi</i>)</b> | 0.67 | 0.494 | 0.789 | 0.65 | 0.08 | p<0.05 (against <i>mir-80(Δ)</i> EV) |
| <b><i>mir-80(Δ)</i> (<i>cbp-1 RNAi</i>)</b> | 0.54 | 0.49  | 0.79  | 0.60 | 0.09 | p<0.05 (against <i>mir-80(Δ)</i> EV) |
