# Supplementary material for: Deletion of microRNA-80 Activates Dietary Restriction to Extend C. elegans Healthspan and Lifespan
Source: PubMed Central journal article supplement (PMC3757059; doi:10.1371/journal.pgen.1003737), 2013-08-29
Supplement: pgen.1003737.s013.pdf [file pgen.1003737.s013.pdf]

## Supplemental References:

1. Apfeld J, O'Connor G, McDonagh T, DiStefano PS, Curtis R (2004) The AMP-activated protein kinase AAK-2 links energy levels and insulin-like signals to lifespan in *C. elegans*. *Genes & Dev* 18: 3004-3009.
2. Wormbase (2011) WormBase web site, <http://www.wormbase.org>, release WS224 date 8/17/2011.
3. Jia K, Levine B (2007) Autophagy is required for dietary restriction-mediated life span extension in *C. elegans*. *Autophagy* 3: 597-599.
4. Park SK, Link CD, Johnson TE (2010) Life-span extension by dietary restriction is mediated by NLP-7 signaling and coelomocyte endocytosis in *C. elegans*. *FASEB J* 24: 383-392.
5. Chen D, Thomas EL, Kapahi P (2009) HIF-1 modulates dietary restriction-mediated lifespan extension via IRE-1 in *Caenorhabditis elegans*. *PLoS Genet* 5: e1000486.
6. Chalasani SH, Kato S, Albrecht DR, Nakagawa T, Abbott LF, et al. (2010) Neuropeptide feedback modifies odor-evoked dynamics in *Caenorhabditis elegans* olfactory neurons. *Nat Neurosci* 13: 615-621.
7. Papaioannou S, Holden-Dye L, Walker RJ (2008) The actions of *Caenorhabditis elegans* neuropeptide-like peptides (NLPs) on body wall muscle of *Ascaris suum* and pharyngeal muscle of *C. elegans*. *Acta Biol Hung* 59 Suppl: 189-197.
8. Honjoh S, Yamamoto T, Uno M, Nishida E (2009) Signalling through RHEB-1 mediates intermittent fasting-induced longevity in *C. elegans*. *Nature* 457: 726-730.
9. Tissenbaum HA, Guarente L (2001) Increased dosage of a *sir-2* gene extends lifespan in *Caenorhabditis elegans*. *Nature* 410: 227-230.
10. Carrano AC, Liu Z, Dillin A, Hunter T (2009) A conserved ubiquitination pathway determines longevity in response to diet restriction. *Nature* 460: 396-399.
11. Furuya N, Yu J, Byfield M, Pattingre S, Levine B (2005) The evolutionarily conserved domain of Beclin 1 is required for Vps34 binding, autophagy and tumor suppressor function. *Autophagy* 1: 46-52.
